# Supplementary material
Source: ML conference proceedings conference paper supplement (https://proceedings.neurips.cc/paper_files/paper/2017/hash/fb60d411a5c5b72b2e7d3527cfc84fd0-Abstract.html)
Supplement: Supplementary file [file fb60d411a5c5b72b2e7d3527cfc84fd0-Supplemental.zip]

## A Hyper-parameters

To determine good hyper-parameters, we evaluated performance on six games (Beam Rider, Breakout, Pong, Q-bert, Space Invaders, Seaquest, as in [14]). We varied learning rates, sampling from  $LogUniform(10^{-4}, 10^{-2})$ , and found the learning rate to work robustly between  $5 \times 10^{-4}$  to  $10^{-3}$ . We thus opted to retain the canonical A3C baseline settings of learning rate  $= 6 \times 10^{-4}$ , entropy cost  $= 10^{-2}$ , unroll length  $N = 20$ , and RMSProp as optimizer [9]. We varied the cost trade-off  $c_\beta$ , sampling from  $LogUniform(10^{-2}, 10^2)$ , and found it to be robust between 0.1 and 1; we set it to  $c_\beta = 0.5$  in all experiments. The final set of hyper-parameters was fixed across all 57 Atari games.

| Game              | Random    | Human    | Baseline A3C | A3C+NVA   |
|-------------------|-----------|----------|--------------|-----------|
| alien             | 128.3     | 6,371.3  | 562.5        | 610.2     |
| amidar            | 11.8      | 1,540.4  | 200.1        | 220.3     |
| assault           | 166.9     | 628.9    | 3,275.8      | 2,908.3   |
| asterix           | 164.5     | 7,536.0  | 7,123.8      | 7,718.3   |
| asteroids         | 871.3     | 36,517.3 | 2,674.1      | 21,074.7  |
| atlantis          | 13,463.0  | 26,575.0 | 710,499.5    | 882,379.0 |
| bank heist        | 21.7      | 644.5    | 934.1        | 925.9     |
| battle zone       | 3,560.0   | 33,030.0 | 10,710.0     | 9,715.0   |
| beam rider        | 254.6     | 14,961.0 | 9,161.0      | 8,901.1   |
| berzerk           | 196.1     | 2,237.5  | 763.1        | 1,417.7   |
| bowling           | 35.2      | 146.5    | 46.1         | 47.2      |
| boxing            | -1.5      | 9.6      | 71.2         | 54.0      |
| breakout          | 1.6       | 27.9     | 423.0        | 563.9     |
| centipede         | 1,925.5   | 10,321.9 | 4,094.1      | 1,893.4   |
| chopper command   | 644.0     | 8,930.0  | 4,446.0      | 4,727.5   |
| crazy climber     | 9,337.0   | 32,667.0 | 105,399.0    | 107,951.0 |
| defender          | 1,965.5   | 14,296.0 | 39,208.3     | 41,940.8  |
| demon attack      | 208.3     | 3,442.8  | 75,830.9     | 88,609.3  |
| double dunk       | -16.0     | -14.4    | -0.2         | -0.1      |
| enduro            | -81.8     | 740.2    | -82.3        | -82.5     |
| fishing derby     | -77.1     | 5.1      | 15.1         | 18.5      |
| freeway           | 0.1       | 25.6     | 0.1          | 0.1       |
| frostbite         | 66.4      | 4,202.8  | 208.9        | 207.9     |
| gopher            | 250.0     | 2,311.0  | 9,114.8      | 8,791.3   |
| gravitar          | 245.5     | 3,116.0  | 310.8        | 292.3     |
| hero              | 1,580.3   | 25,839.4 | 28,931.2     | 31,572.7  |
| ice hockey        | -9.7      | 0.5      | -4.2         | -4.4      |
| jamesbond         | 33.5      | 368.5    | 375.3        | 360.0     |
| kangaroo          | 100.0     | 2,739.0  | 127.0        | 181.0     |
| krull             | 1,151.9   | 2,109.1  | 5,455.6      | 5,783.4   |
| kung fu master    | 304.0     | 20,786.8 | 28,954.8     | 27,917.0  |
| montezuma revenge | 25.0      | 4,182.0  | 49.0         | 51.5      |
| ms pacman         | 197.8     | 15,375.0 | 996.9        | 896.0     |
| name this game    | 1,747.8   | 6,796.0  | 5,204.6      | 6,193.5   |
| phoenix           | 1,134.4   | 6,686.2  | 6,159.1      | 7,656.5   |
| pitfall           | -348.8    | 5,998.9  | -188.7       | -137.8    |
| pong              | -18.0     | 15.5     | 18.8         | 18.7      |
| private eye       | 662.8     | 64,169.1 | 293.5        | 164.1     |
| qbert             | 183.0     | 12,085.0 | 10,592.0     | 11,313.9  |
| riverraid         | 588.3     | 14,382.2 | 9,569.0      | 9,516.1   |
| road runner       | 200.0     | 6,878.0  | 37,313.5     | 38,147.0  |
| robotank          | 2.4       | 8.9      | 2.3          | 2.3       |
| seaquest          | 215.5     | 40,425.8 | 1,959.5      | 2,394.9   |
| skiing            | -15,287.4 | -3,686.6 | -14,164.0    | -13,957.7 |
| solaris           | 2,047.2   | 11,032.6 | 1,882.2      | 1,627.9   |
| space invaders    | 182.6     | 1,464.9  | 866.2        | 1,833.0   |
| star gunner       | 697.0     | 9,528.0  | 58,156.0     | 56,795.5  |
| surround          | -9.7      | 5.4      | -8.2         | -7.0      |
| tennis            | -21.4     | -6.7     | -8.0         | -7.1      |
| time pilot        | 3,273.0   | 5,650.0  | 9,409.5      | 10,180.0  |
| tutankham         | 12.7      | 138.3    | 159.4        | 138.3     |
| up n down         | 707.2     | 9,896.1  | 83,976.3     | 97,562.4  |
| venture           | 18.0      | 1,039.0  | 22.0         | 18.0      |
| video pinball     | 0.0       | 15,641.1 | 30,912.4     | 210,555.7 |
| wizard of wor     | 804.0     | 4,556.0  | 4,628.0      | 4,438.0   |
| yars revenge      | 1,476.9   | 47,135.2 | 7,157.5      | 6,306.7   |
| zaxxon            | 475.0     | 8,443.0  | 11,282.5     | 11,709.0  |

Table 2: Performance on all games for the human starts condition.

| Game              | Random    | Human    | Baseline A3C | A3C+NVA   |
|-------------------|-----------|----------|--------------|-----------|
| alien             | 227.8     | 7,127.7  | 1,684.7      | 1,576.3   |
| amidar            | 5.8       | 1,719.5  | 907.4        | 1,021.5   |
| assault           | 222.4     | 742.0    | 3,484.9      | 3,089.4   |
| asterix           | 210.0     | 8,503.3  | 16,364.0     | 19,518.0  |
| asteroids         | 719.1     | 47,388.7 | 3,900.1      | 27,242.1  |
| atlantis          | 12,850.0  | 29,028.1 | 711,682.5    | 887,543.0 |
| bank heist        | 14.2      | 753.1    | 1,286.7      | 1,283.5   |
| battle zone       | 2,360.0   | 37,187.5 | 13,745.0     | 12,050.0  |
| beam rider        | 363.9     | 16,926.5 | 7,853.0      | 7,840.4   |
| berzerk           | 123.7     | 2,630.4  | 892.5        | 1,804.7   |
| bowling           | 23.1      | 160.7    | 36.9         | 37.9      |
| boxing            | 0.1       | 12.1     | 90.7         | 89.8      |
| breakout          | 1.7       | 30.5     | 466.1        | 608.5     |
| centipede         | 2,090.9   | 12,017.0 | 5,476.5      | 5,025.3   |
| chopper command   | 811.0     | 7,387.8  | 6,833.0      | 6,194.0   |
| crazy climber     | 10,780.5  | 35,829.4 | 116,127.0    | 127,244.0 |
| defender          | 2,874.5   | 18,688.9 | 45,526.0     | 49,383.3  |
| demon attack      | 152.1     | 1,971.0  | 68,416.4     | 85,708.1  |
| double dunk       | -18.6     | -16.4    | -0.6         | -0.4      |
| enduro            | 0.0       | 860.5    | 0.0          | 0.0       |
| fishing derby     | -91.7     | -38.7    | 32.9         | 35.1      |
| freeway           | 0.0       | 29.6     | 0.0          | 0.0       |
| frostbite         | 65.2      | 4,334.7  | 286.8        | 309.0     |
| gopher            | 257.6     | 2,412.5  | 9,320.4      | 9,818.0   |
| gravitar          | 173.0     | 3,351.4  | 246.8        | 219.3     |
| hero              | 1,027.0   | 30,826.4 | 34,285.7     | 36,897.2  |
| ice hockey        | -11.2     | 0.9      | -4.5         | -5.0      |
| jamesbond         | 29.0      | 302.8    | 446.5        | 465.0     |
| kangaroo          | 52.0      | 3,035.0  | 53.0         | 106.0     |
| krull             | 1,598.0   | 2,665.5  | 6,765.6      | 7,216.1   |
| kung fu master    | 258.5     | 22,736.3 | 34,471.0     | 35,051.5  |
| montezuma revenge | 0.0       | 4,753.3  | 0.5          | 0.0       |
| ms pacman         | 307.3     | 6,951.6  | 3,458.5      | 2,679.5   |
| name this game    | 2,292.3   | 8,049.0  | 6,006.9      | 7,469.8   |
| phoenix           | 761.4     | 7,242.6  | 7,302.4      | 8,842.0   |
| pitfall           | -229.4    | 6,463.7  | -4.7         | -10.9     |
| pong              | -20.7     | 14.6     | 20.7         | 20.6      |
| private eye       | 24.9      | 69,571.3 | 97.8         | 99.3      |
| qbert             | 163.9     | 13,455.0 | 22,869.8     | 25,128.1  |
| riverraid         | 1,338.5   | 17,118.0 | 14,330.1     | 14,580.1  |
| road runner       | 11.5      | 7,845.0  | 44,329.0     | 46,152.5  |
| robotank          | 2.2       | 11.9     | 2.7          | 2.8       |
| seaquest          | 68.4      | 42,054.7 | 1,648.6      | 1,716.6   |
| skiing            | -17,098.1 | -4,336.9 | -16,156.8    | -16,071.6 |
| solaris           | 1,236.3   | 12,326.7 | 2,328.2      | 2,318.5   |
| space invaders    | 148.0     | 1,668.7  | 1,294.2      | 2,362.1   |
| star gunner       | 664.0     | 10,250.0 | 61,219.5     | 59,481.0  |
| surround          | -10.0     | 6.5      | -7.7         | -6.8      |
| tennis            | -23.8     | -8.3     | -6.3         | -2.0      |
| time pilot        | 3,568.0   | 5,229.2  | 10,784.5     | 11,610.0  |
| tutankham         | 11.4      | 167.6    | 300.9        | 277.2     |
| up n down         | 533.4     | 11,693.2 | 114,094.1    | 157,066.1 |
| venture           | 0.0       | 1,187.5  | 0.0          | 0.0       |
| video pinball     | 0.0       | 17,667.9 | 35,435.7     | 195,883.1 |
| wizard of wor     | 563.5     | 4,756.5  | 5,215.5      | 6,051.0   |
| yars revenge      | 3,092.9   | 54,576.9 | 10,932.8     | 11,310.1  |
| zaxxon            | 32.5      | 9,173.3  | 14,143.5     | 14,507.5  |

Table 3: Performance on all games for the no-op starts condition.
